# Supplementary material
Source: PubMed Central journal article supplement (PMC11108375)
Supplement: 18_2015_2022_MOESM1_ESM.pdf [file 18_2015_2022_MOESM1_ESM.pdf]

**Online Resource 1.** Sequences of primers used for site directed mutagenesis and PCR reactions.

| Primer name | Primer sequence (5'-3')                          |
|-------------|--------------------------------------------------|
| EcoPrPF     | CCGGAATTCATGGCGAACCTTGGCTACTGGCTG                |
| BamPrPR     | CGCGGATCCTCATCCCACGATCAGGAAGATGAG                |
| 3F4-WT-F    | CAGCAAACCAAAAACCAACCTCAAGCATGTGGCAGGGGCTGCGG     |
| 3F4-WT-R    | CCGCAGCCCCTGCCACATGCTTGAGGTTGGTTTTTGGTTTGCTG     |
| MycPrPF2    | CAAAAGCTTATATCCGAAGAAGACCTTGACGGGAGAAGATCCAGCAGC |
| MycPrPR2    | CTTCGGATATAAGCTTTTGTTCGGATCTTCTCCCGTCGTAATAG     |
| D177NF      | AACAACCTTCGTGCACAACCTGCGTCAATATCACC              |
| D177NR      | GGTGATATTGACGCAGTTGTGCACGAAGTTGTT                |
| E199KF      | CACCAAGACCGATGTGAAGATG                           |
| E199KR      | CATCTTCACATCGGTCTTGGTG                           |
| V209IF      | GAGCGCGTGATTGAGCAGATGTGC                         |
| V209IR      | GCACATCTGCTCAATCACGCGCTC                         |
