# Supplementary material
Source: PubMed Central journal article supplement (PMC11108375)
Supplement: 18_2015_2022_MOESM2_ESM.pdf [file 18_2015_2022_MOESM2_ESM.pdf]

## Online Resource 2. Conditions for site directed mutagenesis and PCR reactions.

| PCR #         | Template             | Forward primer | Reverse primer | Hot start      | Temperatures (°C) and time (seconds) for Denaturation, Annealing, Extension | Cycles | Final extension |
|---------------|----------------------|----------------|----------------|----------------|-----------------------------------------------------------------------------|--------|-----------------|
| Site-directed | 3F4Prnp              | 3F4-WT-F       | 3F4-WT-R       | 95°C,<br>2min  | Temp: 95, 60, 68<br>Time: 60, 50, 360                                       | 18     | 68°C,<br>7min   |
|               | PrP-myc              | D177NF         | D177NR         |                |                                                                             |        |                 |
|               | PrP-myc              | E199KF         | E199KR         |                |                                                                             |        |                 |
|               | PrP-myc              | V209IF         | V209IR         |                |                                                                             |        |                 |
| A             | WTPrnp or 3F4Prnp    | EcoPrPF        | MycPrPR2       | 94°C,<br>5min  | Temp: 94, 60, 72<br>Time: 60, 60, 60                                        | 35     | 72°C,<br>10min  |
| B             | WTPrnp or 3F4Prnp    | MycPrPF2       | BamPrPR        | 94°C,<br>14min | Temp: 95, 55, 72<br>Time: 30, 30, 60                                        | 45     | 72°C,<br>1min   |
| C             | PCR products A and B |                |                |                | Temp: 94, 50, 72<br>Time: 30, 1500, 300                                     | 10     |                 |
| D             | PCR product C        | EcoPrPF        | BamPrPR        | 94°C,<br>5min  | Temp: 94, 60, 72<br>Time: 60, 60, 60                                        | 35     | 72°C,<br>10min  |
