# Supplementary material
Source: PubMed Central journal article supplement (PMC11108375)
Supplement: 18_2015_2022_MOESM3_ESM.pdf [file 18_2015_2022_MOESM3_ESM.pdf]

**Online Resource 3. Antibodies and dilutions used for western blotting.**

| Primary antibody (Company)             | Prion protein epitope            | Dilution | Secondary antibody (HRP conjugated) | Dilution |
|----------------------------------------|----------------------------------|----------|-------------------------------------|----------|
| Anti-Myc tag, clone 4A6 (Millipore)    | Myc tag inserted after codon 230 | 1:5000   | Anti-mouse                          | 1:7000   |
| EP1802Y (Abcam)                        | Codons 214-230                   | 1:5000   | Anti-rabbit                         | 1:7000   |
| 6H4 (Prionics)                         | Codons 144-152                   | 1:8000   | Anti-mouse                          | 1:8000   |
| ICSM18 (D-Gen)                         | Codons 143-153                   | 1:10000  | Anti-mouse                          | 1:10000  |
| 3F4 (Covance)                          | Codons 109-112                   | 1:5000   | Anti-mouse                          | 1:10000  |
| 6D11 (Eurogenetec)                     | Codons 93-109                    | 1:5000   | Anti-mouse                          | 1:8000   |
| SAF32 (Caymen Chemical)                | Codons 79-92 (octarepeat region) | 1:3000   | Anti-mouse                          | 1:7000   |
| Anti- $\beta$ -actin (Sigma-Aldrich)   | -                                | 1:30000  | Anti-mouse                          | 1:10000  |
| Anti- $\beta$ -tubulin (Sigma-Aldrich) | -                                | 1:10000  | Anti-mouse                          | 1:10000  |
| Anti-Bcl-2 (BD Biosciences)            | -                                | 1:1000   | Anti-mouse                          | 1:5000   |
| Anti-Bip (BD Biosciences)              | -                                | 1:1000   | Anti-mouse                          | 1:5000   |
| Anti-Flot1 (BD Biosciences)            | -                                | 1:2000   | Anti-mouse                          | 1:7000   |
| Anti-transferrin receptor (Invitrogen) | -                                | 1:2500   | Anti-mouse                          | 1:7000   |
