# Supplementary material
Source: PubMed Central journal article supplement (PMC11108375)

**Online Resource 5.** The complete cell surface biotinylation experiment of the results presented in Figure 4D. Input lysate or NeutrAvidin precipitated proteins from cell surface biotinylated (Biotin) or unlabeled control (CTL) cells immediately after labeling (T0), or cells (T6) and conditioned media (T6M) after 6h of further culturing, were analysed by PAGE and western blotting with the anti-Myc antibody to detect PrP<sup>C</sup> species, or the anti-transferrin receptor antibody. The different full length and truncated PrP<sup>C</sup> species are indicated. The closed arrow indicates cross-reactivity with the NeutrAvidin monomer in the precipitation eluate samples only.

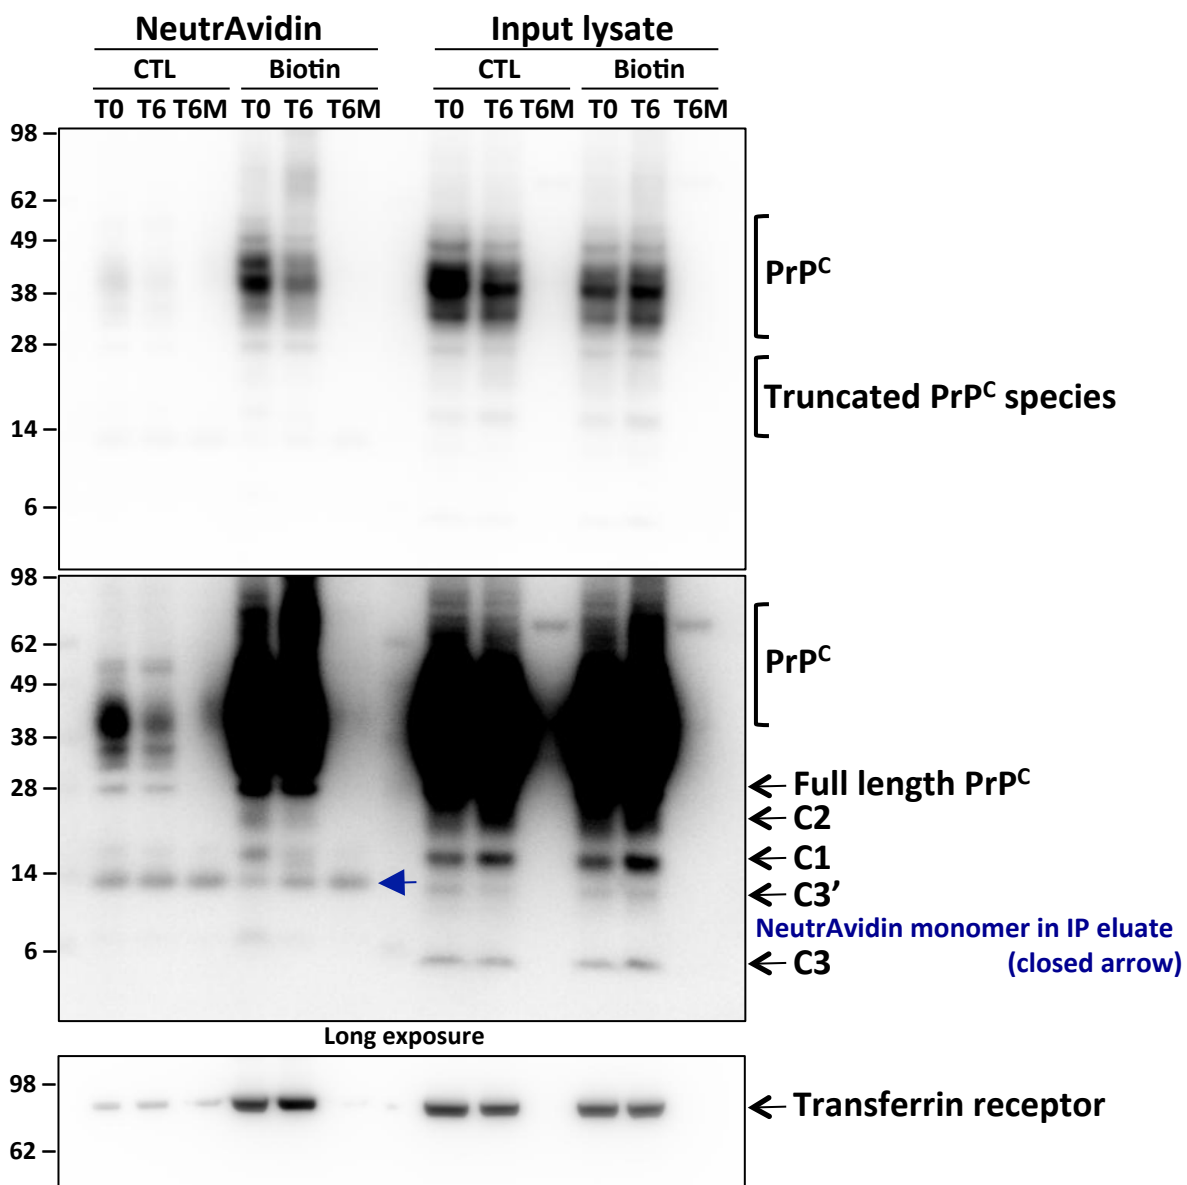

Supplement: 18_2015_2022_MOESM5_ESM.pdf [file 18_2015_2022_MOESM5_ESM.pdf]
