# Supplementary material
Source: PubMed Central journal article supplement (PMC11108375)
Supplement: 18_2015_2022_MOESM6_ESM.pdf [file 18_2015_2022_MOESM6_ESM.pdf]

**Online Resource 6.** Alignment of PrP residues 170-230 (Human PrP numbering) in mammalian species listed in the National Center for Biotechnology Information (NCBI) Conserved Domains Database. Residues with 100% sequence identity are shaded in grey.

|              | 170           | 190      | 202           | 230                           |                                  |
|--------------|---------------|----------|---------------|-------------------------------|----------------------------------|
| gi 190518    | SNQNNFVHDCVNI | -TIKQHTV | TTTTKGFNFTETD | VKMMERVVEQMCITQYERESQAYYQ     | -RGS Human                       |
| gi 62900675  | SNQNNFVHDCVNI | -TVKQHTV | TTTTKGFNFTETD | IKMMERVVEQMCITQYQTESQAYYQ     | -RGA Nilgai antelope             |
| gi 730409    | SNQNNFVHDCVNI | -TVKQHTV | TTTTKGFNFTETD | IKMMERVVEQMCITQYQRESEAYYQ     | -RGA Greater Kudu                |
| gi 171473240 | SNQNNFVHDCVNI | -TIKQHTV | TTTTKGFNFTETD | VKIMERMVEQMCVTOYQREYQAAAYQ    | -RGS Small-eared galago          |
| gi 53801347  | SNQNNFVHDCVNI | -TVKQHTV | TTTTKGFNFTETD | IKMMERVVEQMCITQYQRESQAYYQ     | -RGA Red deer                    |
| gi 169245352 | SNQNNFVHDCVNI | -TVRQHTV | TTTTKGFNFTETD | MKIMERVVEQMCVTOYQKSEAYYQ      | -RGA Cheetah                     |
| gi 169245370 | SNQNNFVHDCVNI | -TVRQHTV | TTTTKGFNFTETD | MKIMERVVEQMCVTOYQKAEAYYQ      | -RGA Lynx bobcat                 |
| gi 730386    | SNQNNFVHDCVNI | -TIKQHTV | TTTTKGFNFTETD | VKMMERVVEQMCITQYQEKESQAYYQ    | -RGS Red-bellied titi            |
| gi 169245376 | SNQNNFVHDCVNI | -TVRQHTV | TTTTKGFNFTETD | MKIMERVVEQMCVTOYQKSEAYYQ      | -RGA Clouded leopard             |
| gi 74475859  | SNQNNFVHDCVNI | -TVKQHTV | TTTTKGFNFTETD | IKMMERVVEQMCITQYQRESEAYYQ     | -RGA Sheep                       |
| gi 27733818  | SNQNNFVHDCVNI | -TIKQHTV | TTTTKGFNFTETD | IKIMERVVEQMCITQYQQEARASY      | --YSS Large tree shrew           |
| gi 6981410   | SNQNNFVHDCVNI | -TIKQHTV | TTTTKGFNFTETD | VKMMERVVEQMCVTOYQKESQAYYDgRRS | Norway rat                       |
| gi 169245362 | SNQNNFVHDCVNI | -TVRQHTV | TTTTKGFNFTETD | MKIMERVVEQMCVTOYQKSEAYYQ      | -RGA domestic cat                |
| gi 130913    | NNQNNFVHDCVNI | -TIKQHTV | TTTTKGFNFTETD | IKIMERVVEQMCITQYQKESQAYYDgRRS | Golden hamster                   |
| gi 18033741  | SNQNNFVHDCVNI | -TIKQHTV | TTTTKGFNFTETD | VKMMERVVEQMCVTOYQKESQAYYDgRRS | European wood mouse              |
| gi 3183140   | NNQNNFVHDCVNI | -TIKQHTV | TTTTKGFNFTETD | VKMMERVVEQMCVTOYQKESQAYYDgRRS | Chinese hamster                  |
| gi 3183139   | NNQNNFVHDCVNI | -TIKQHTV | TTTTKGFNFTETD | VKMMERVVEQMCVTOYQKESQAYYDgRRS | Armenian hamster                 |
| gi 119489920 | NNQNNFVHDCVNI | -TIKQHTV | TTTTKGFNFTETD | IKIMERVVEQMCITQYQKESQAYYDgRRS | Golden hamster                   |
| gi 258640099 | SNQNNFVHDCVNI | -TIKQHTV | TTTTKGFNFTETD | VKMMERVVEQMCVTOYQKESQAYYE     | -GRS Southern red-backed vole    |
| gi 38154460  | SNQNNFVHDCVNI | -TIKQHTV | TTTTKGFNFTETD | VKMMERVVEQMCITQYQEKESQAYYQ    | -RGS Rhesus monkey               |
| gi 195957005 | SNQNNFVHDCVNI | -TVKQHTV | TTTTKGFNFTETD | VKIMERVVEQMCITQYQKEYEAFQ      | -RGA Przewalski horse            |
| gi 149345731 | SNQNNFVHDCVNI | -TIKQHTV | TTTTKGFNFTETD | VKMMERVVEQMCVTOYQKESQAYYDgRRS | Egyptian spiny mouse             |
| gi 18033743  | NNQNNFVHDCVNI | -TIKQHTV | TTTTKGFNFTETD | VKMMERVVEQMCVTOYQKESQAYYE     | -GRS Bank vole                   |
| gi 149345710 | NNQNNFVHDCVNI | -TIKQHTV | TTTTKGFNFTETD | VKMMERVVEQMCVTOYQKESQAYYDgRRS | Old field mouse                  |
| gi 171473201 | SNQNNFVHDCVNI | -TIKQHTV | TTTTKGFNFTETD | IKMMERVVEQMCVTOYQQEYQASYQ     | -RAA American pika               |
| gi 258640105 | NNQNNFVHDCVNI | -TIKQHTV | TTTTKGFNFTETD | VKMMERVVEQMCVTOYQKESQAYYE     | -GRY Meadow vole                 |
| gi 258640109 | NNQNNFVHDCVNI | -TIKQHTV | TTTTKGFNFTETD | VKMMERVVEQMCVTOYQKESQAYYDgRRS | White-footed mouse               |
| gi 258640107 | NNQNNFVHDCVNI | -TIKQHTV | TTTTKGFNFTETD | VKMMERVVEQMCVTOYQKESQAYYDgRRS | North American deer mouse        |
| gi 195973416 | NNQNNFVHDCVNI | -TIKQHTV | TTTTKGFNFTETD | VKMMERVVEQMCITQYQRESQAYYDgRRS | Siberian hamster                 |
| gi 195973414 | NNQNNFVHDCVNI | -TIKQHTV | TTTTKGFNFTETD | VKMMERVVEQMCVTOYQRESQAYYDgRRS | Campbell's desert hamster        |
| gi 4406467   | SNQNNFVHDCVNI | -TIKQHTV | TTTTKGFNFTETD | VKMMERVVEQMCVTOYQKESQAYYDgRRS | Mongolian gerbil                 |
| gi 195957017 | SNQNNFVHDCVNI | -TVKQHTV | TTTTKGFNFTETD | VKIMERVVEQMCITQYQKEYEAFQ      | -RGA Horse                       |
| gi 2213811   | NNQNTFVHDCVNI | -TVKQHTV | TTTTKGFNFTETD | IKMMERVVEQMCITQYQRESQAYYQ     | -RGA Mule deer                   |
| gi 4406481   | SNQNNFVHDCVNI | -TVKQHTV | TTTTKGFNFTETD | IKMMERVVEQMCITQYRRESQAYYQ     | -RGA Nyala antelope              |
| gi 133874740 | NNQNSFVHDCVNI | tVKQHTV  | TTTTKGFNFTETD | IKMMERVVEQMCITQYQREYEAAYYQ    | -RGA Rough-toothed dolphin       |
| gi 133874750 | NSQNSFVHDCVNI | tVKQHTV  | TTTTKGFNFTETD | IKMMERVVEQMCITQYQREYQAYYQ     | -RGA Fin whale                   |
| gi 133874738 | NNQNSFVHDCVNI | tVKQHTV  | TTTTKGFNFTETD | IKMMERVVEEMCTTQYQREYQAYYQ     | -RGA Cuvier's beaked whale       |
| gi 730387    | SNQNNFVHDCVNI | -TIKQHTV | TTTTKGFNFTETD | VKMMERVVEQMCITQYERESQAYYQ     | -RGS Tufted capuchin             |
| gi 1709776   | SSQNNFVHDCVNI | -TVKQHTV | TTTTKGFNFTETD | IKIMERVVEQMCITQYQAEYEAQAQ     | -RAY Common brushtailed possum   |
| gi 730383    | SNQNNFVHDCVNI | -TIKQHTV | TTTTKGFNFTETD | VKIMERVVEQMCITQYQEKESQAYYQ    | -RGS Northern owl monkey         |
| gi 55140672  | SNQNNFVHDCVNI | -TIKQHTV | TTTTKGFNFTETD | VKMMERVVEQMCITQYQEKESQAYYQ    | -RGS Black-and-red howler monkey |
| gi 119489942 | SNQNSFVHDCVNI | -TVKQHTV | TTTTKGFNFTETD | IKIMERVVEQMCITQYQQESQAYYQ     | -RAA Rabbit                      |
